# Supplementary material
Source: ML conference proceedings conference paper supplement (https://openreview.net/forum?id=hxJu0386if)
Supplement: supplementary_material [file attachment]

---

# Focus on Query: Adversarial Mining Transformer for Few-Shot Segmentation

## Supplementary Materials

---

Anonymous Author(s)

Affiliation

Address

email

### 1 More Details for Multi-scale Object Mining Transformer.

In the object mining transformer  $G$ , we alternately use down-sampling layers and self-attention layers to construct hierarchical query features. And the corresponding pseudo support features are obtained by the Hadamard product of the downsampled  $M_{q\tau}$ , specifically,

$$\mathbf{F}_{q,l} = \mathbf{Down}(\mathcal{F}^{-1}(\mathbf{FeatAgg}(\mathcal{F}(\mathbf{F}_{q,l-1}), \mathcal{F}(\mathbf{F}_{q,l-1})))), \quad (1)$$

where the  $\mathcal{F} : \mathbb{R}^{H \times W \times C} \mapsto \mathbb{R}^{HW \times C}$  is the spatial flatten operation and  $\mathbf{Down}$  denotes the down-sampling layers, which is implemented with convolutional layers of double strides. In this way, we obtain multi-scale query features  $\mathbf{F}_{q,l} \in \mathbb{R}^{\frac{H}{2^{l-1}} \times \frac{W}{2^{l-1}} \times C}$ ,  $l = 1, \dots, L$  and pseudo support features  $\mathbf{F}_{psd,l} = \mathbf{F}_{q,l} \odot \varphi(M_{q\tau})$ . ( $\varphi$  is bilinear interpolation operation). We perform feature aggregation within each scale to enable contextual information exploration, thus avoiding the spatial inconsistency in the query image.  $L$  is set to 3 in our experiments. The embedding dim is set to 64, and the number of head is set to 4 in all the attention layers.

### 2 Detailed Experimental Settings

To achieve a fair comparison with previous methods [1–3], we adopt the ensemble strategy following BAM [1] to filter the base categories seen during training. Specifically, a base learner is trained using the training splits in a fully supervised manner, and the learned base learner is used to explicitly predict the targets of base classes. PSPNet [4] is adopted as the base learner in all of our experiments, and we follow the BAM [1] to ensemble the prediction of the base learner and the proposed AMFormer. Our code is available at [https://github.com/\\*\\*\\*\\*/\\*\\*\\*\\*](https://github.com/****/****) (Anonymity will be lifted after publication).

We also conduct an additional ablation experiment to evaluate the influence of the ensemble strategy as shown in Table 1. We can observe that the ensemble strategy can incrementally improve performance. It should be noted that our AMFormer can also surpass previous state-of-the-art methods (IPMT [5]) without the ensemble strategy.

Table 1: Ablation of ensemble strategy on Pascal-5<sup>i</sup> with ResNet-101 backbone and 1-shot setting.

|              | fold0       | fold1       | fold2       | fold3       | mean        |
|--------------|-------------|-------------|-------------|-------------|-------------|
| IPMT [5]     | <b>71.6</b> | 73.5        | 58.0        | 61.2        | 66.1        |
| w/o ensemble | 69.7        | <b>75.2</b> | <b>69.5</b> | <b>62.9</b> | <b>69.3</b> |
| w/ ensemble  | 71.3        | 76.7        | 70.7        | 63.9        | 70.7        |

### 23 3 Dataset Settings

24 We respectively divided PASCAL-5<sup>i</sup> and COCO-20<sup>i</sup> into four splits following [6] for cross-validation. In Table 2 and Table 3, we provide the detailed split settings.

Table 2: Detailed splits setting of PASCAL-5<sup>i</sup>

| Fold                  | Test classes                                 |
|-----------------------|----------------------------------------------|
| PASCAL-5 <sup>0</sup> | aeroplane, bicycle, bird, boat, bottle       |
| PASCAL-5 <sup>1</sup> | bus, car, cat, chair, cow                    |
| PASCAL-5 <sup>2</sup> | diningtable, dog, horse, motorbike, person   |
| PASCAL-5 <sup>3</sup> | potted plant, sheep, sofa, train, tv/monitor |

25

## 26 4 More Experimental Results

### 27 4.1 Quantitative analysis of intra-object similarity.

28 We compute the average pairwise pixel similarity from the same object (intra-object) and different  
 29 objects from the support and query images of the same category (inter-object) using the cosine  
 30 similarity. Note that the pixel features that we used to compute the similarity are middle-level features  
 31  $\mathbf{F}_s$  and  $\mathbf{F}_q$  as described in the L255-L256 in the original manuscript. The quantitative results of  
 32 different categories are provided in Table 4 and Table 5. From the tables, we can observe that the  
 33 intra-object similarity is at least one order of magnitude higher than the inter-object similarity. This  
 34 demonstrates the superiority of the query-centric approach relying on intra-object similarity over  
 35 support-centric methods that rely on inter-object similarity.

### 36 4.2 More visualization results.

37 **Visualization of segmentation at different stages.** We tackle query-centric FSS by applying three  
 38 intuitive procedures. (1) Discriminative region localization. (2) Local to global expansion. (3) Coarse  
 39 to fine alignment. To illustrate the effects of the above three steps, in Figure 1, we visualize the  
 40 outcomes of different stages. Procedure (1) can only roughly local the discriminative region of the  
 41 target (2<sup>nd</sup> column of Figure 1). In procedure (2), the object mining transformer  $G$  exploits the  
 42 intra-object similarity to explore multi-scale contextual information, thus highlighting the whole  
 43 object (3<sup>rd</sup> column of Figure 1). Segmentation from  $G$  can roughly cover the entire target but there  
 44 still exist misalignments as shown in the yellow boxes in the 3<sup>rd</sup> column of Figure 1. The detail  
 45 mining transformer  $D$  is responsible for discriminating those detailed misalignments, *i.e.*, procedure  
 46 (3). The proposed AMFormer couples procedures (2) and (3) via adversarial training. In this way, the  
 47  $G$  can be optimized to generate more accurate segmentations(4<sup>th</sup> column of Figure 1) to fool  $D$ .

48 **Visualization of activation maps.** We visualize the attention weight of query features between the  
 49 support target and pseudo support. Specifically, the attention matrix  $\mathbf{S} \in \mathbb{R}^{H_q W_q \times H_s W_s}$  is computed  
 50 according to the Eqn (1) of the original manuscript. Then we compute the average activation of each  
 51 query pixel over all support foreground pixels:

$$\mathbf{Act}(i) = \frac{\sum_{j=1}^{H_s W_s} \mathbf{S}(i, j) \cdot [\mathcal{F}(\mathbf{M}_s)(j) > 0]}{\sum_{j=1}^{H_s W_s} [\mathcal{F}(\mathbf{M}_s)(j) > 0]}, \quad (2)$$

52 where the  $\mathbf{M}_s$  is the (pseudo) support mask. In the baseline, the  $\mathbf{S}$  is oriented from the cross attention  
 53 between the query features and the support features (support-centric). While in our query-centric  
 54 AMFormer, the  $\mathbf{S}$  is computed from the pseudo support and the query features. As shown in Figure 2,  
 55 the support targets not only cannot fully activate the target in the query image, but also frequently  
 56 activates the background categories. While the pseudo support can well excavate the full object  
 57 attribute to intra-object similarity.

58 **Visualization of local proxies.** To explore the regions of interest for learnable local proxies, Figure 3  
 59 visualizes the activation maps of a part of proxies. It can be observed that different proxies tend  
 60 to focus on different local regions, and most proxies attend to the boundaries of the object, which

Table 3: Detailed splits setting of COCO-20<sup>i</sup>

| Fold                 | Test classes                                                                                                                                                                            |
|----------------------|-----------------------------------------------------------------------------------------------------------------------------------------------------------------------------------------|
| COCO-20 <sup>0</sup> | Person, Airplane, Boat, Park meter, Dog, Elephant, Backpack, Suitcase, Sports ball, Skateboard, W. glass, Spoon, Sandwich, Hot dog, Chair, D. table, Mouse, Microwave, Fridge, Scissors |
| COCO-20 <sup>1</sup> | Bicycle, Bus, T.light, Bench, Horse, Bear, Umbrella, Frisbee, Kite, Surfboard, Cup, Bowl, Orange, Pizza, Couch, Toilet, Remote, Oven, Book, Teddy                                       |
| COCO-20 <sup>2</sup> | Car, Train, Fire H., Bird, Sheep, Zebra, Handbag, Skis, B. bat, T. racket, Fork, Banana, Broccoli, Donut, P. plant, TV, Keyboard, Toaster, Clock, Hairdrier                             |
| COCO-20 <sup>3</sup> | Motorcycle, Truck, Stop, Cat, Cow, Giraffe, Tie, Snowboard, B. glove, Bottle, Knife, Apple, Carrot, Cake, Bed, Laptop, Cellphone, Sink, Vase, Toothbrush                                |

Table 4: Intra- and inter-object similarity of each class within Pascal-5<sup>i</sup>,

| Pascal-5 <sup>0</sup> |        |        | Pascal-5 <sup>1</sup> |        |        | Pascal-5 <sup>2</sup> |        |        | Pascal-5 <sup>3</sup> |        |        |
|-----------------------|--------|--------|-----------------------|--------|--------|-----------------------|--------|--------|-----------------------|--------|--------|
| class                 | Intra- | Inter- |
| aeroplane             | 0.449  | 0.008  | bus                   | 0.453  | 0.011  | diningtable           | 0.496  | 0.010  | potted plant          | 0.515  | 0.012  |
| bicycle               | 0.460  | 0.009  | bus                   | 0.453  | 0.011  | dog                   | 0.571  | 0.009  | sheep                 | 0.536  | 0.007  |
| bird                  | 0.493  | 0.010  | cat                   | 0.643  | 0.021  | horse                 | 0.489  | 0.012  | sofa                  | 0.535  | 0.006  |
| boat                  | 0.483  | 0.009  | chair                 | 0.519  | 0.015  | motorbike             | 0.445  | 0.008  | train                 | 0.509  | 0.008  |
| bottle                | 0.504  | 0.120  | cow                   | 0.573  | 0.016  | person                | 0.529  | 0.039  | tv/monitor            | 0.513  | 0.024  |

Table 5: Intra- and inter-object similarity of each class within COCO-20<sup>i</sup>

| COCO-20 <sup>0</sup> |        |        | COCO-20 <sup>1</sup> |        |        | COCO-20 <sup>2</sup> |        |        | COCO-20 <sup>3</sup> |        |        |
|----------------------|--------|--------|----------------------|--------|--------|----------------------|--------|--------|----------------------|--------|--------|
| class                | Intra- | Inter- |
| Person               | 0.553  | 0.002  | Bicycle              | 0.398  | 0.017  | Car                  | 0.514  | 0.012  | Motorcycle           | 0.485  | 0.007  |
| Airplane             | 0.582  | 0.020  | Bus                  | 0.440  | 0.019  | Train                | 0.544  | 0.017  | Truck                | 0.552  | 0.021  |
| Boat                 | 0.585  | 0.013  | T.light              | 0.474  | 0.013  | Fire H.              | 0.467  | 0.007  | Stop                 | 0.544  | 0.008  |
| Park meter           | 0.476  | 0.014  | Bench                | 0.459  | 0.044  | Bird                 | 0.530  | 0.016  | Cat                  | 0.549  | 0.010  |
| Dog                  | 0.482  | 0.010  | Horse                | 0.574  | 0.018  | Sheep                | 0.487  | 0.010  | Cow                  | 0.584  | 0.015  |
| Elephant             | 0.467  | 0.012  | Bear                 | 0.460  | 0.012  | Zebra                | 0.510  | 0.012  | Giraffe              | 0.556  | 0.013  |
| Backpack             | 0.479  | 0.013  | Umbrella             | 0.571  | 0.020  | Handbag              | 0.519  | 0.032  | Tie                  | 0.559  | 0.006  |
| Suitcase             | 0.542  | 0.007  | Frisbee              | 0.384  | 0.005  | Skis                 | 0.432  | 0.007  | Snowboard            | 0.509  | 0.014  |
| Sports ball          | 0.538  | 0.009  | Kite                 | 0.470  | 0.016  | B.bat                | 0.532  | 0.023  | B.glove              | 0.576  | 0.006  |
| Skateboard           | 0.537  | 0.018  | Surfboard            | 0.589  | 0.024  | T.racket             | 0.373  | 0.012  | Bottle               | 0.545  | 0.007  |
| W.glass              | 0.434  | 0.011  | Cup                  | 0.606  | 0.009  | Fork                 | 0.451  | 0.017  | Knife                | 0.589  | 0.013  |
| Spoon                | 0.562  | 0.027  | Bowl                 | 0.563  | 0.010  | Banana               | 0.511  | 0.015  | Apple                | 0.656  | 0.010  |
| Sandwich             | 0.469  | 0.013  | Orange               | 0.474  | 0.028  | Broccoli             | 0.471  | 0.026  | Carrot               | 0.539  | 0.007  |
| Hot dog              | 0.558  | 0.008  | Pizza                | 0.515  | 0.015  | Donut                | 0.477  | 0.300  | Cake                 | 0.597  | 0.006  |
| Chair                | 0.442  | 0.015  | Couch                | 0.542  | 0.013  | P.plant              | 0.433  | 0.032  | Bed                  | 0.560  | 0.007  |
| D.table              | 0.474  | 0.046  | Toilet               | 0.503  | 0.006  | TV                   | 0.456  | 0.014  | Laptop               | 0.480  | 0.021  |
| Mouse                | 0.447  | 0.021  | Remote               | 0.583  | 0.011  | Keyboard             | 0.542  | 0.007  | Cellphone            | 0.498  | 0.018  |
| Microwave            | 0.454  | 0.019  | Oven                 | 0.567  | 0.011  | Toaster              | 0.433  | 0.007  | Sink                 | 0.375  | 0.027  |
| Fridge               | 0.476  | 0.023  | Book                 | 0.586  | 0.025  | Clock                | 0.526  | 0.018  | Vase                 | 0.567  | 0.013  |
| Scissors             | 0.456  | 0.027  | Teddy                | 0.583  | 0.016  | Hairdrier            | 0.373  | 0.007  | Toothbrush           | 0.479  | 0.013  |

61 is usually the most ambiguous region. In addition, a particular proxy consistently focuses on the  
62 boundaries in a specific direction, *e.g.*, *proxy 1* always activates the right border (5<sup>th</sup> column). Through  
63 the cooperation of multiple proxies, our detail mining transformer  $G$  can effectively detect the detailed  
64 local differences between the prediction of the object mining transformer  $G$  and the ground truth. By  
65 means of adversarial training,  $G$  will produce more accurate segmentations, especially in ambiguous  
66 regions, by adjusting itself to fool  $D$ .

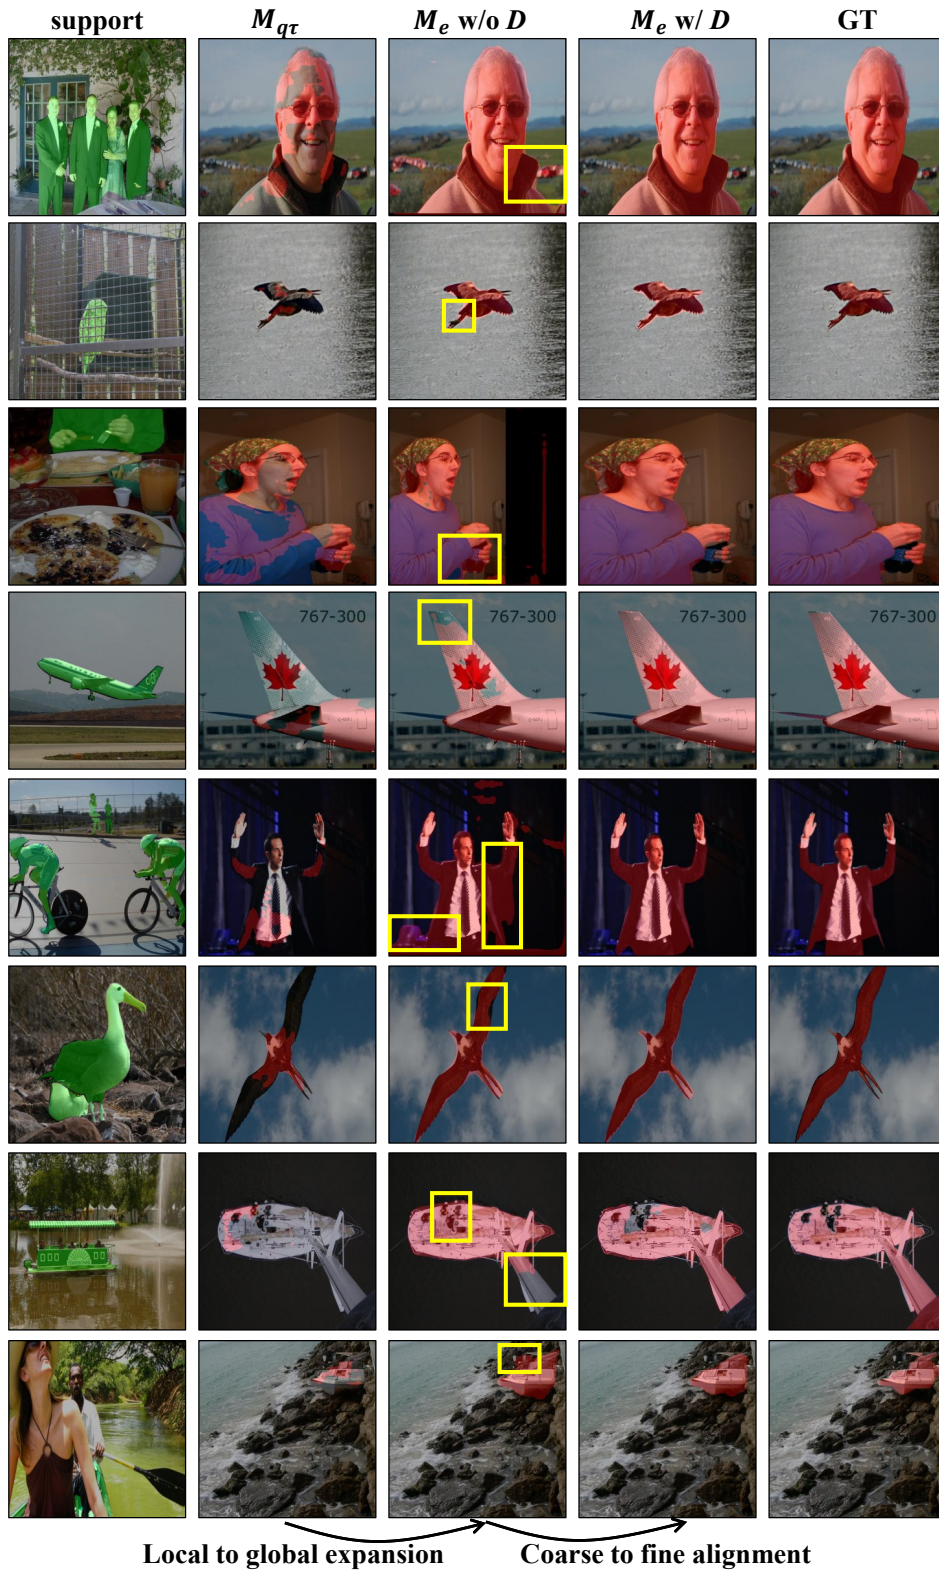

Figure 1: Visualization of the segmentation of the proposed AMFormer at different stages

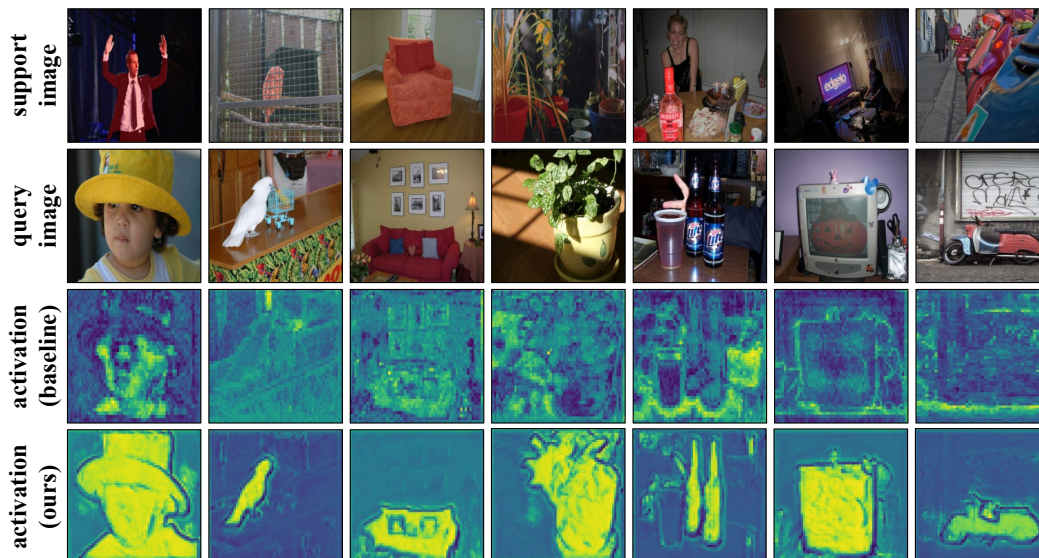

Figure 2: Visualizations of the attention weight of query features between the support target (support-centric baseline) and pseudo support (ours).

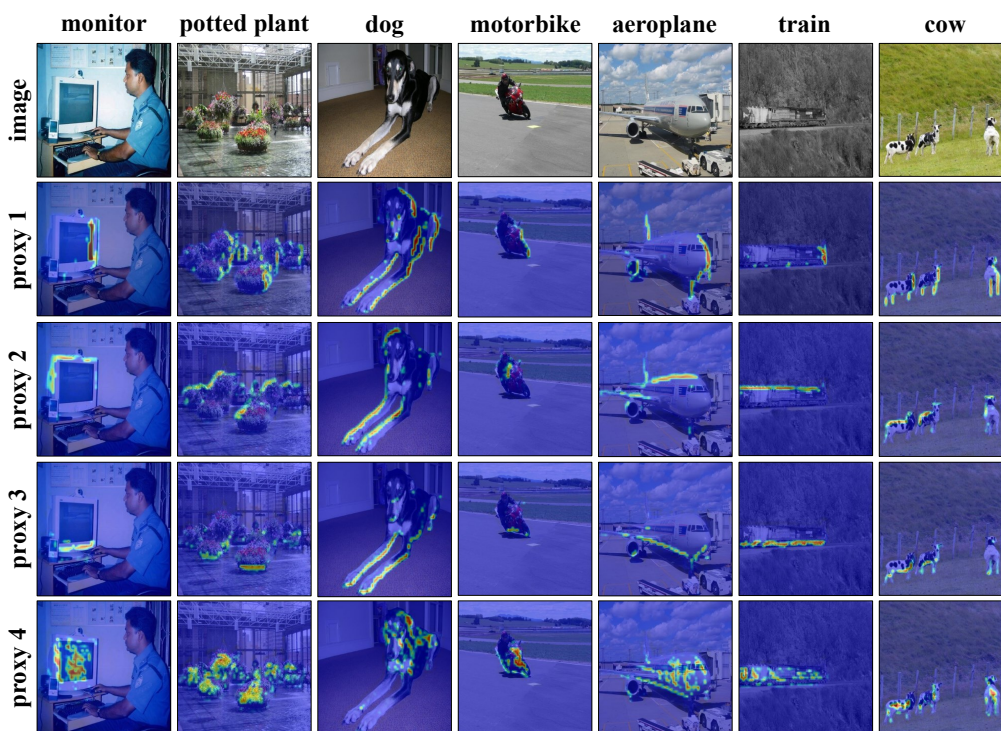

Figure 3: Visualizations of the activated regions of local proxies.

## 67 References

- 68 [1] Chunbo Lang, Gong Cheng, Binfei Tu, and Junwei Han. Learning what not to segment: A new  
69 perspective on few-shot segmentation. In *Proceedings of the IEEE/CVF Conference on Computer  
70 Vision and Pattern Recognition*, pages 8057–8067, 2022.
- 71 [2] Bohao Peng, Zhuotao Tian, Xiaoyang Wu, Chenyao Wang, Shu Liu, Jingyong Su, and Ji-  
72 aya Jia. Hierarchical dense correlation distillation for few-shot segmentation. *arXiv preprint*

- 73      *arXiv:2303.14652*, 2023.
- 74 [3] Ehtesham Iqbal, Sirojbek Safarov, and Seongdeok Bang. Msanet: Multi-similarity and attention  
75 guidance for boosting few-shot segmentation. *arXiv preprint arXiv:2206.09667*, 2022.
- 76 [4] Hengshuang Zhao, Jianping Shi, Xiaojuan Qi, Xiaogang Wang, and Jiaya Jia. Pyramid scene  
77 parsing network. In *Proceedings of the IEEE conference on computer vision and pattern  
78 recognition*, pages 2881–2890, 2017.
- 79 [5] Yuanwei Liu, Nian Liu, Xiwen Yao, and Junwei Han. Intermediate prototype mining transformer  
80 for few-shot semantic segmentation. *arXiv preprint arXiv:2210.06780*, 2022.
- 81 [6] Zhuotao Tian, Hengshuang Zhao, Michelle Shu, Zhicheng Yang, Ruiyu Li, and Jiaya Jia. Prior  
82 guided feature enrichment network for few-shot segmentation. *IEEE Transactions on Pattern  
83 Analysis & Machine Intelligence*, (01):1–1, 2020.
